# Supplementary material for: A new polymorph of glipizide with enhanced properties obtained using environmentally friendly methods
Source: Royal Society of Chemistry journal article supplement (doi:10.1039/c6ce00571c), 2016-01-01
Supplement: c6ce00571c11.pdf [file c6ce00571c11.pdf]

**Table S1.** Theoretical and tested values of elemental analysis of Form I, Form II and Form III of glipizide.

| Sample   | Content (%) |            |        |            |       |            |       |            |
|----------|-------------|------------|--------|------------|-------|------------|-------|------------|
|          | C           | $\Delta C$ | N      | $\Delta N$ | H     | $\Delta H$ | S     | $\Delta S$ |
| Theory   | 56.612      | —          | 15.719 | —          | 6.108 | —          | 7.196 | —          |
| Form I   | 56.805      | 0.193      | 15.670 | -0.049     | 6.022 | -0.086     | 7.461 | 0.265      |
| Form II  | 56.572      | -0.040     | 15.608 | -0.111     | 6.074 | -0.034     | 7.471 | 0.275      |
| Form III | 56.594      | -0.018     | 15.959 | 0.240      | 6.138 | 0.030      | 7.170 | -0.026     |
