# Supplementary figures and images for: A new polymorph of glipizide with enhanced properties obtained using environmentally friendly methods
Source: Royal Society of Chemistry journal article supplement (doi:10.1039/c6ce00571c), 2016-01-01

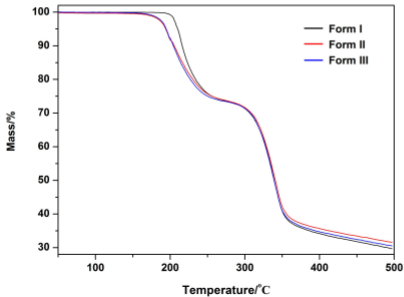

Supplement: c6ce00571c2.pdf [file c6ce00571c2.pdf]

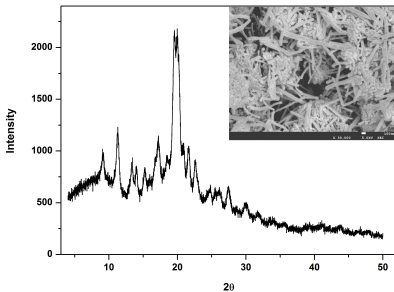

Supplement: c6ce00571c3.pdf [file c6ce00571c3.pdf]

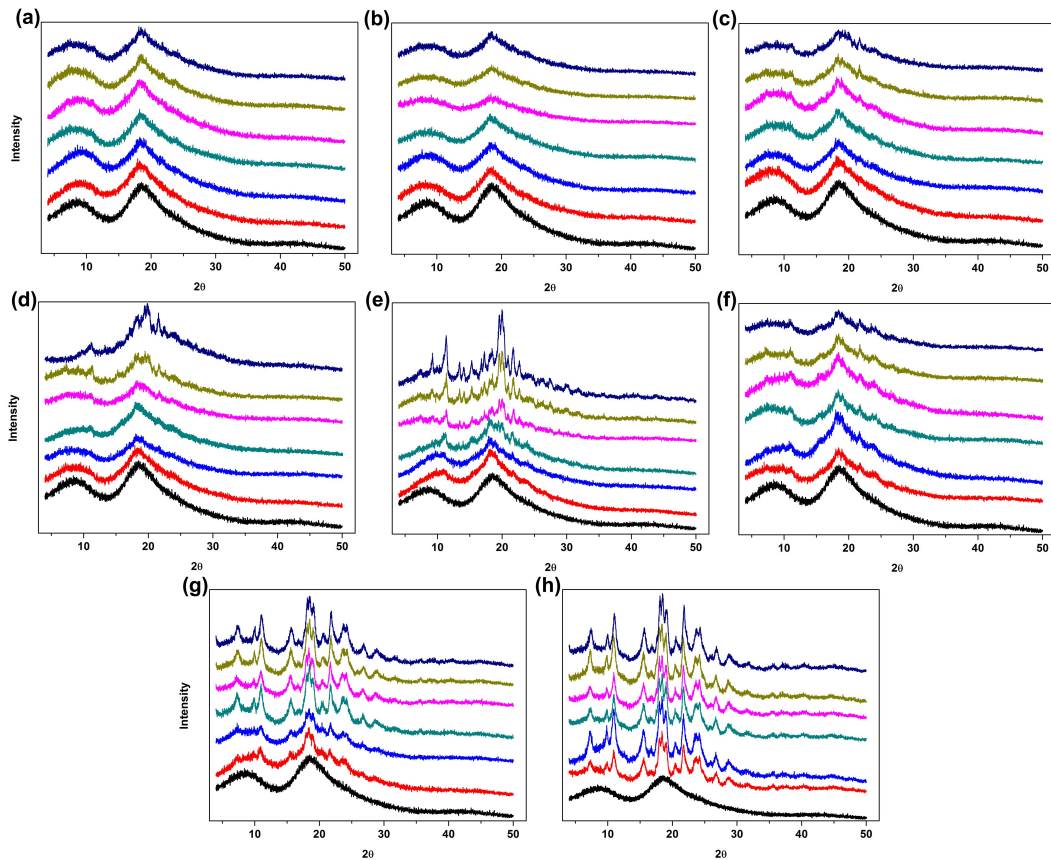

Supplement: c6ce00571c6.pdf [file c6ce00571c6.pdf]

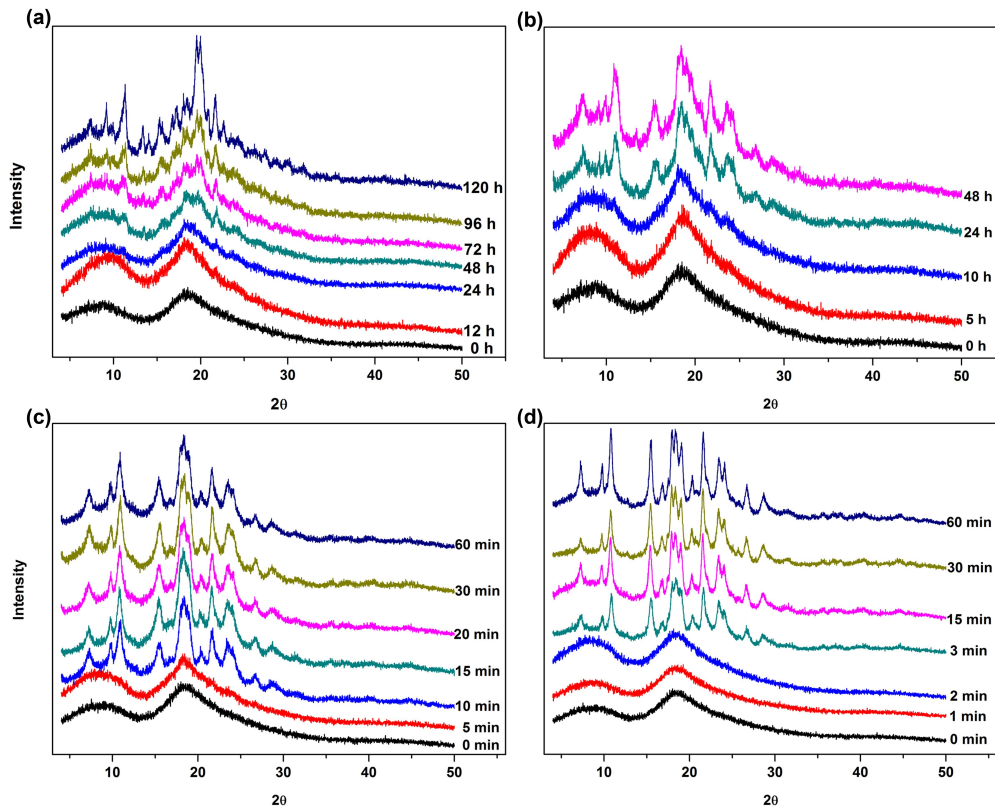

Supplement: c6ce00571c7.pdf [file c6ce00571c7.pdf]

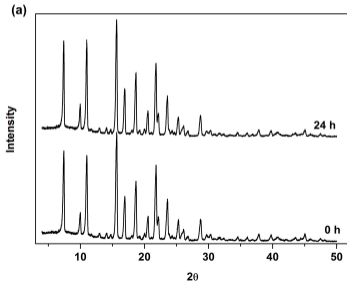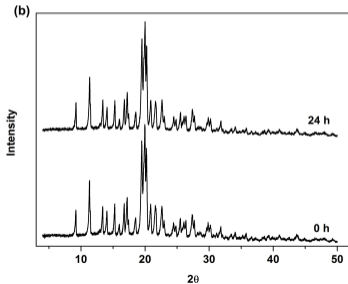

Supplement: c6ce00571c8.pdf [file c6ce00571c8.pdf]
